1 **A stress-response-related inter-compartmental signalling pathway**  
2 **regulates embryonic cuticle integrity in Arabidopsis**

3 **Audrey Creff<sup>1</sup>, Lysiane Brocard<sup>2</sup>, Jérôme Joubès<sup>3,4</sup>, Ludivine Taconnat<sup>5</sup>, Nicolas M.**  
4 **Doll<sup>1</sup>, Stephanie Pascal<sup>3,4</sup>, Roberta Galletti<sup>1</sup>, Anne-Charlotte Marsollier<sup>1</sup>, Steven**  
5 **Moussu<sup>1</sup>, Thomas Widiez<sup>1</sup>, Frédéric Domergue<sup>3,4\*</sup>, and Gwyneth Ingram<sup>1\*</sup>**  
6

7 <sup>1</sup> Laboratoire Reproduction et Développement des Plantes, Univ Lyon, ENS de Lyon, UCB  
8 Lyon 1, CNRS, INRA, F-69342, Lyon, France.

9 <sup>2</sup> CNRS/ University of Bordeaux, Plant Imaging Platform of Bordeaux Imaging Center, UMS  
10 3420, F-33000 Bordeaux, France

11 <sup>3</sup> Université de Bordeaux, Laboratoire de Biogenèse Membranaire, UMR5200, F-33000  
12 Bordeaux, France.

13 <sup>4</sup> CNRS, Laboratoire de Biogenèse Membranaire, UMR5200, F-33000 Bordeaux, France.

14 <sup>5</sup> Institut of Plant Sciences Paris-Saclay (IPS2), UMR 9213/UMR1403, CNRS, INRA,  
15 Université Paris-Sud, Université d'Evry, Université Paris-Diderot, Sorbonne Paris-Cité,  
16 Bâtiment 630, 91405 Orsay, France

17

18 \* Authors for correspondence ([Gwyneth.Ingram@ens-lyon.fr](mailto:Gwyneth.Ingram@ens-lyon.fr); [bordeaux.fr](mailto:Frederic.Domergue@u-<br/>19 bordeaux.fr))

20

21

## 22 ABSTRACT

23 **The embryonic cuticle is necessary for normal seed development and seedling establishment**  
24 **in Arabidopsis. Although mutants with defective embryonic cuticles have been identified,**  
25 **neither the deposition of cuticle material, nor its regulation, has been described during**  
26 **embryogenesis. Here we use electron microscopy, lipid staining and permeability assays to**  
27 **show that cuticle deposition initiates *de novo* in patches on globular embryos. By combining**  
28 **these techniques with genetics and gene expression analysis, we show that successful patch**  
29 **coalescence to form a continuous cuticle requires a signalling involving the endosperm-**  
30 **specific subtilisin protease ALE1 and the receptor kinases GSO1 and GSO2, which are**  
31 **expressed in the developing embryonic epidermis. Transcriptome analysis shows that this**  
32 **pathway regulates stress-related gene expression in seeds. Consistent with these findings we**  
33 **show genetically, and through activity analysis, that the stress-associated MPK6 protein acts**  
34 **downstream of GSO1 and GSO2 in the developing embryo. We propose that a stress-**  
35 **related signalling pathway has been hijacked in some angiosperm seeds through the**  
36 **recruitment of endosperm-specific components. Our work reveals the presence of an inter-**  
37 **compartmental dialogue between the endosperm and embryo that ensures the formation of**  
38 **an intact and functional cuticle around the developing embryo through an “auto-immune”**  
39 **type interaction.**

40

41

## 42 INTRODUCTION

43 The Arabidopsis seed is a complex structure composed of three genetically distinct compartments,  
44 the maternally-derived seed coat, the embryo, and the endosperm. After fertilization the expansion  
45 of the endosperm drives the growth of the seed. However, during later developmental stages the

46 endosperm breaks down, leaving space for the growing embryo. By the end of seed development,  
47 only a single endosperm cell layer envelops the embryonic tissues (reviewed in [1]).

48

49 The endosperm is an angiosperm innovation, thought to have arisen through the  
50 sexualisation of the central cell of the female gametophyte [2]. The ancestors of angiosperms  
51 probably had seeds more similar to those of gymnosperms, in which tissues of the female  
52 gametophyte proliferate independently of egg cell fertilization to produce a nutrient rich storage  
53 tissue. However, the endosperm plays not only a nutritional role, but also a role in regulating  
54 embryo development. For example, the peptide CLAVATA3/EMBRYO SURROUNDING  
55 REGION-RELATED8 (CLE8) may act non-cell autonomously to regulate early Arabidopsis  
56 embryogenesis [3]. Recently, maternally-expressed peptides present in the central cell pre-  
57 fertilization, and subsequently in the early EMBRYO SURROUNDING REGION (ESR), were  
58 shown to regulate Arabidopsis suspensor development. Genetic analysis suggests that this  
59 regulation could be mediated by a pathway involving the Receptor-Like Cytoplasmic Kinase  
60 SHORT SUSPENSOR [4,5], although the receptor involved remains unidentified.

61

62 In previous works we showed genetically that the ESR-specific subtilisin protease  
63 Abnormal LEaf-shape1 (ALE1) acts in the same genetic pathway as two embryonically-expressed  
64 receptor kinases, GASSHO1 [(GSO1) also known as SCHENGEN3 [6]] and GASSHO2 (GSO2),  
65 to control the formation of the embryonic cuticle in developing seeds [7-10]. Our results indicate  
66 that a seed specific inter-tissue signalling event is necessary for the formation of a functional  
67 embryonic cuticle [7]. The results of genetic studies have led us to speculate that the role of this  
68 pathway is to ensure the robust elimination of apoplastic continuity between the developing  
69 embryo and the surrounding endosperm thus gating molecular movement between the two  
70 compartments [11,12].

71

72           The cuticle is the outermost layer of the aerial parts of the plant. It is a highly complex  
73 structure mainly composed of a lipid polymer (cutin) and waxes, either associated with the  
74 polymer (intracuticular waxes) or deposited on the top of it (epicuticular waxes) (recently  
75 reviewed in [13,14]). Cutin and waxes are composed of complex mixtures of hydroxylated and  
76 very long-chain fatty acid derivatives, respectively. Cuticle structure and composition are highly  
77 regulated not only at the tissue level, but also in response to environmental stimuli such as  
78 drought, radiation and pollution [13,14]. In addition, several reports have highlighted the  
79 important role played by the cuticle in biotic interactions, and particularly in protecting plants  
80 from attack by bacterial pathogens (reviewed in [13,15,16]).

81           In *Arabidopsis* although little, if any, evidence exists for the presence of cutin-like  
82 substances in the wall between the mature egg cell and the central cell, by the end of  
83 embryogenesis the hypocotyl and cotyledons of the embryo are covered with a continuous cuticle  
84 which renders the germinating seedling impermeable to hydrophilic dyes, and resistant to water  
85 loss [17]. Cuticle biogenesis is considered to be a unique property of epidermal cells [18]. During  
86 plant development, epidermal cells are generated by anticlinal divisions of pre-existing epidermal  
87 cells so that each cell inherits an intact external cuticularised cell wall. In this respect the  
88 embryonic cuticle is atypical as it is deposited *de novo* at the interface between the developing  
89 embryo and endosperm. Although mutants with defective embryonic cuticles have been described  
90 [7-10,17], only very fragmentary evidence about when the embryonic cuticle appears is present in  
91 the literature. Furthermore, the structure of the embryonic cuticle, its composition, the  
92 mechanisms via which it is deposited and its function during seed development remain  
93 unexplored. In this study we aimed to elucidate how the embryonic cuticle is formed, and to  
94 investigate how the ALE1 GSO1 GSO2 signalling pathway impacts its biosynthesis and  
95 deposition.

96

## 97 RESULTS

### 98 Expression of genes involved in cuticle deposition initiates during early embryogenesis.

99 An inspection of available *in silico* data [19-21] showed that many genes encoding enzymes  
100 thought to be involved in cutin biosynthesis are expressed during early embryogenesis  
101 (Supplementary Figure 1). *In situ* hybridisations confirmed that genes known to affect cuticle  
102 production (*LACS2* [22,23], *FIDDLEHEAD/KCS10* [24-27], *LACERATA* [28] and  
103 *BODYGUARD* [29]) or export (*LTPGI* [30] and *ABCG11* [31]) have a clear epidermis-  
104 specific expression from the mid globular stage onwards (Figure 1, Supplementary Figure 2,  
105 Supplementary Figure 3).

106 In agreement with published and *in silico* data [9] (Supplementary Figure 1) *GSO1*  
107 and *GSO2* were expressed in the embryo from early developmental stages (Figure 1,  
108 Supplementary Figure 3). In addition, their expression was mainly restricted to the embryonic  
109 epidermis. *GSO1* expression in the embryonic epidermis was further confirmed using plants  
110 expressing a functional genomic *GSO1*-mVENUS fusion under the control of the *GSO1*  
111 promoter (*pGSO1:GSO1-mVENUS*) [6] (Figure 2). This construction fully complemented the  
112 cuticle permeability phenotype of *gso1-1 gso2-1* double mutant seedlings, and strongly  
113 reduced the misshapen-seed phenotype of *gso1-1 gso2-1* mutant seeds when introduced into  
114 the *gso1-1 gso2-1* mutant background (Figure 2).

115 Since previous results showed that epidermal identity is not affected in *gso1-1 gso2-1*  
116 mutants [12], the expression of cuticle biosynthesis genes was analysed by *in situ*  
117 hybridization in *gso1-1 gso2-1* double mutant seeds (which show a stronger cuticle phenotype  
118 than *ale1-4* mutants [7]). As shown in Figure 1 (and Supplementary Figure 2, Supplementary  
119 Figure 3), no reduction in the expression of any of the cuticle biogenesis genes analysed was

120 detected in the embryonic epidermis of this background, whereas reduced expression of both  
121 *GSO1* and *GSO2* was clearly visible. For these results, we concluded that although many  
122 genes involved in cuticle biosynthesis are co-expressed with *GSO1* and *GSO2* in the  
123 embryonic epidermis, their expression is not dependent upon *GSO1* and *GSO2*.

#### 124 Loss of *GSO1/GSO2* and *ALE1* function affects cuticle integrity

125 The cutin content of seedling cotyledons was assessed by measuring the quantities of the main  
126 cutin monomers released after cutin isolation followed by depolymerisation (mainly C16 and  
127 C18  $\omega$ OH (omega-hydroxy acid) and DCA ( $\alpha,\omega$ -dicarboxylic acid)). As clearly illustrated by  
128 the quantification of 18:2-DCA, the major component of Arabidopsis cutin, a slight loss in  
129 cutin load was detected in *gso1-1 gso2-1*, but not in *ale1-4* cotyledons compared to wild-type.  
130 In contrast a very clear reduction in cutin load was observed in control plants lacking the  
131 acyltransferases *GPAT4* and *GPAT8* required for cutin biosynthesis, as has previously been  
132 reported in rosette leaves [32] (Figure 3a). We therefore investigated the cuticle permeability  
133 of etiolated cotyledons by submerging them in the hydrophilic dye toluidine blue, which can  
134 only penetrate internal tissues through defects in the cuticle [17]. Surprisingly, we found that  
135 the cotyledons of etiolated *gpat4 gpat8* seedlings showed a rather similar toluidine blue  
136 permeability to *ale1-4* seedlings and a considerably reduced permeability compared to *gso1-1*  
137 *gso1-2* double mutants, suggesting that the *gpat4 gpat8* cuticle, although quantitatively  
138 strongly deficient in cutin monomers, remains partially functional (Figure 3b). Taken together  
139 with gene expression analysis, these results suggest that the *ALE1*, *GSO1* and *GSO2*-  
140 mediated signalling pathway might impact cuticle organisation or integrity rather than the  
141 quantity of cuticle components produced by epidermal cells.

142 The process of embryonic cuticle deposition was investigated in more detail in wild-  
143 type (Col-0) seeds (Figure 4a-d). At the two-cell stage the embryo was surrounded by a thick

144 cell wall but no electron dense material was detected at the embryo surface. At the mid-late  
145 globular stage, a cutin-like electron-dense material was detected in patches (Figure 4b and  
146 Supplementary Figure 5a,b). From heart stage onwards, an apparently continuous layer of  
147 electron-dense cutin-like material was detected at the surface of the outer epidermal cell wall.  
148 Embryonic cuticle production therefore involves the *de novo* deposition and subsequent  
149 coalescence of “patches” of cuticular material at the surface of epidermal cells. Toluidine blue  
150 assays with wild-type embryos extruded at different developmental stages indicated that  
151 permeability started to reduce noticeably at the early torpedo stage (slightly after apparent gap  
152 closure), and that the embryo continued to become more and more impermeable during  
153 embryo development (Supplementary Figure 4), suggesting that the coalescence of gaps in the  
154 embryonic cuticle correlates well with a reduction in embryonic permeability.

155 In *gso1-1 gso2-1* mutants the cuticle still showed discontinuities at the heart and  
156 walking stick stage (Figure 4e-f, Supplementary Figure 5c-f). In this background the cuticle  
157 also appeared thicker, but less condensed than that of wild-type embryos. The outer epidermal  
158 cell wall was also abnormally thick at later stages (compare embryonic cell wall thickness in  
159 Figure 4d with that in 4f). Similar discontinuities were observed, although at a lower  
160 frequency, in the *ale1-4* background at the heart stage as described previously [10], but were  
161 less frequent at later stages, consistent with the less severe cuticle permeability phenotype  
162 observed in the seedlings of this background (Figure 4g-h). These results are consistent with  
163 our hypothesis that the ALE1 GSO1 GSO2 pathway is necessary for generating a continuous  
164 cuticle layer and further suggest that it controls “gap closure” during embryonic cuticle  
165 maturation.

166 GSO1 GSO2 and ALE1 regulate overlapping gene sets and promote the expression of defence  
167 related genes during seed development.

168 Transcriptional analysis of intact siliques from *gso1-1 gso2-1* and *ale1-4* mutants and wild-  
169 type plants was carried out at globular and heart stages. The results are provided in Figure 5a  
170 and b, Supplementary Table 1, and Supplementary Figures 6 and 7. The number of  
171 differentially down-regulated genes in the mutant backgrounds compared to wild-type was  
172 higher than the number of up-regulated genes (Supplementary Table 1). A moderate overlap  
173 between genes showing higher expression in *ale1-4* and *gso1-1 gso2-1* mutants than wild-type  
174 controls was observed (Supplementary Figure 6, Supplementary Table 1). In contrast more  
175 than three quarters of the genes showing reduced expression at both developmental stages in  
176 the *gso1-1 gso2-1* background also showed reduced expression at both developmental stages  
177 in *ale1-4* mutants (Figure 5a and Supplementary Table 1), corroborating previously published  
178 genetic evidence that ALE1, GSO1 and GSO2 act in the same genetic pathway [7]. Because  
179 *ALE1* appears to be expressed exclusively in the ESR region of the endosperm [7,8,10], genes  
180 mis-regulated in both mutant backgrounds likely comprise *bona fide* targets (direct and  
181 indirect) of the ALE1 GSO1 GSO2 pathway, despite the fact that the expression of *GSO1* and  
182 *GSO2* is not restricted to the seed [6,9,20].

183 Genes up-regulated in both mutant backgrounds showed a moderate over-  
184 representation in GO terms associated with responses to abiotic stress (Supplementary Figure  
185 6). In contrast, genes down-regulated in both backgrounds, particularly at the heart stage,  
186 showed a very striking overrepresentation for GO terms linked to abiotic and biotic stress  
187 responses (Figure 5b, Supplementary Figure 7). Mis-regulation of 19 of these genes was  
188 validated using additional independent biological samples by qRT-PCR (Supplementary  
189 Figure 8). The expression levels of these genes in seeds were generally low, and attempts to  
190 carry out *in situ* hybridization were inconclusive. However for one target, *SWI3A* [33],  
191 expression in the developing embryo predicted from *in silico* data was confirmed, and shown  
192 to be convincingly reduced in embryos of the *gso1-1 gso2-1* double mutant (Supplementary



193 Figure 9). Thus, consistent with the embryonic expression of *GSO1* and *GSO2*, some of the  
194 transcriptional regulation downstream of ALE1 GSO1 GSO2 signalling occurs in the embryo.  
195 Expression of *ALE1* was not reduced in *gso1-1 gso2-1* mutants (Supplementary Table 2 and  
196 Supplementary Figure 8), suggesting that ALE1 is not a downstream target of GSO1 GSO2-  
197 mediated signalling, and could therefore act upstream of GSO1 and GSO2 in mediating  
198 embryonic responses necessary for the establishment of an intact embryonic cuticle.

199 MPK6 acts in the ALE1 GSO1 GSO2 signalling pathway.

200 The GSO1 and GSO2 receptor kinases belong to family XI of the Leucine-Rich Repeat  
201 (LRR)-RLKs [34,35], and are closely related to the “danger” peptide receptors PEPR1 and  
202 PEPR2 [36,37], which are involved in the amplification of defence responses triggered by  
203 pathogen-associated molecular pattern (PAMP) perception [38]. A previous study [39],  
204 reported aberrantly shaped seeds, resembling those of *ale1-4* mutants, in Arabidopsis *mpk6*  
205 mutants lacking the MITOGEN ACTIVATED PROTEIN KINASE6 (MPK6) protein, which  
206 acts downstream of PEPR signalling. In addition a proportion of *mpk6* mutant seeds were  
207 reported to rupture [39]. We confirmed these phenotypes in the *mpk6-2* mutant background  
208 (Supplementary Figure 10). A recent article has suggested that some seed defects in *mpk6*  
209 mutants may depend upon the genotype of the maternal tissues in the seed [40]. Reciprocal  
210 crosses were therefore performed, and these confirmed that seed twisting phenotype is  
211 dependent upon the genotype of the zygotic compartment and not the maternal compartment  
212 (Supplementary Figure 11). We found that a proportion of *mpk6-2* seedlings showed  
213 abnormal permeability to the hydrophilic dye toluidine blue, consistent with the presence of  
214 cuticle defects (Figure 6). Nile red staining [32] of the cotyledons of etiolated seedlings was  
215 used to confirm *mpk6* cuticle defects (Supplementary Figure 12 a,b). Using this technique,  
216 wild-type cotyledons were found to be covered with a continuous lipid cuticle layer. As  
217 previously reported, and consistent with our cutin analysis, *gpat4 gpat8* mutants showed

218 drastically reduced cuticle staining. In contrast *gso1-1 gso2-1* mutants showed a patchy  
219 cuticle, similar to that seen using transmission electron microscopy on the embryo surface.  
220 Both *ale1-4* and *mpk6-2* mutants showed a less well-defined cuticle than wild-type, which  
221 although apparently continuous, showed uneven cutin deposition (Supplementary Figure 12  
222 a,b).

223 Triple *mpk6-2 gso1-1 gso2-1* and double *ale1-4 mpk6-2* mutants were generated to  
224 investigate further the genetic interactions of *ALE1*, *GSO1* and *GSO2* with *MPK6*. Fertility in  
225 *ale1-4 mpk6-2* double mutants was similar to that in *mpk6-2* mutants, while triple *mpk6-2*  
226 *gso1-1 gso2-1* mutant plants were viable but produced very few seeds. In terms of seed shape  
227 and cotyledon cuticle permeability, triple *mpk6-2 gso1-1 gso2-1* mutants had phenotypes  
228 identical to those observed in *gso1-1 gso2-1* double mutants (Figure 6, Supplementary Figure  
229 10). Since all *gso1-1 gso2-1* mutant seeds are twisted, non-additivity cannot be concluded  
230 from this phenotype. However, recent work has shown that additivity of toluidine blue  
231 staining phenotypes can be detected in mutant combinations with *gso1-1 gso2-1* [41]. The  
232 frequency of “twisted” seeds (including ruptured seeds), and toluidine blue stained seedling  
233 cotyledons was non-additive in *ale1-4 mpk6-2* double mutant plants, consistent with *ALE1*,  
234 *GSO1*, *GSO2* and *MPK6* acting in the same genetic pathway to control seedling cotyledon  
235 permeability (Figure 6 and Supplementary Figure 10).

236 *MPK6* is involved in a plethora of reproductive and non-reproductive developmental  
237 processes and shows functional redundancy with other MPK proteins [39,42-52] meaning that  
238 global transcriptome analysis in the *mpk6-2* background would likely be uninformative for  
239 this study. We therefore directly tested a subset of genes mis-regulated in *gso1-1 gso2-1* and  
240 *ale1-4* mutants for misregulation in *mpk6-2* mutants at three stages of embryo development.  
241 Five out of eight genes tested showed reduced expression in *mpk6-2* either at all three stages  
242 (*SWI3A*, *WRKY70* and *NIMIN1*), or in two out of three developmental stages tested (*SIB1* and

243 *NIMIN2*) (Supplementary Figure 13). Unsurprisingly given the relatively weak cuticle  
244 phenotype of *mpk6* mutants compared with *gso1 gso2* mutants, some genes showing strong  
245 down-regulation in the *gso1-1 gso2-1* mutants (*WRKY33*, *WRKY46* and *WRKY53*) did not  
246 show any significant reduction in expression in the *mpk6-2* mutant background  
247 (Supplementary Figure 13) indicating that their transcriptional regulation downstream of  
248 GSO1 and GSO2-mediated signalling could be dependent on signalling components acting  
249 redundantly with MPK6. The expression of *ALE1*, *GSO1* and *GSO2* was not altered in *mpk6-*  
250 *2* mutants (Supplementary Figure 13), indicating that MPK6 most probably acts downstream  
251 of GSO1 and GSO2-mediated signalling.

252 To further confirm this hypothesis, we analysed MPK phosphorylation in developing  
253 seeds from Col-0 and *gso1-1 gso2-1* double mutants. In seedlings, phosphorylation of MPK6  
254 (and additional MPKs) can only be detected after elicitation (for example with the flg22  
255 peptide). The response to flg22 is not attenuated in *gso1/gso2* mutant seedlings  
256 (Supplementary Figure 14 and 15). In contrast, MPK6 phosphorylation (but not  
257 phosphorylation of other MPKs) could be detected in un-elicited seeds (Figure 6b,  
258 Supplementary Figure 16). Following quantification, we found that the degree of  
259 phosphorylation of MPK6 was reduced by approximately 50% in *gso1-1 gso2-1* double  
260 mutant seeds compared to wild-type, suggesting that a significant proportion of MPK6  
261 phosphorylation in seeds depends on the activity of GSO1 and GSO2 (Figure 6c,  
262 Supplementary Figure 16). Intriguingly, in seeds, a band corresponding to a second  
263 phosphorylated MPK was detected exclusively in *mpk6-2* mutants (Figure 6b), suggesting that  
264 the relatively weak *mpk6* seedling cuticle phenotype could be due to compensation by an as  
265 yet unidentified MPK [53].

266 MPK6 activity is required in the embryo, but not the endosperm, to maintain cuticle integrity.

267           The strong expression of GSO1 and GSO2 in the embryonic epidermis, suggests that  
268 the activity of GSO1 and GSO2 in cuticle formation is required in the embryo. No promoters  
269 confirmed as specifically being expressed only in the embryo or embryo epidermis, have been  
270 published. To further confirm the spatial requirement for GSO1/GSO2-dependent signalling  
271 in the seed, we therefore complemented the *mpk6-2* mutant either with the *MPK6* cDNA  
272 expressed under the ubiquitously expressed *RPS5A* promoter, or under the endosperm specific  
273 *RGP3* promoter [54,55]. We were unable to complement either the misshapen seed/seed  
274 bursting phenotypes or the toluidine blue permeability phenotypes of *mpk6-2* mutants by  
275 expressing *MPK6* in the endosperm, but obtained full complementation of all phenotypes in  
276 plants expressing *MPK6* under the *RPS5A* promoter (Figure 7, Supplementary Figures 17).  
277 Together with the results of our reciprocal crosses, these findings indicate that the seedling  
278 permeability phenotype of *mpk6-2* mutants is most likely due to signalling defects in the  
279 embryo. Seed size and seed bursting defects could be caused by lack of MPK6 in the testa, as  
280 suggested by reciprocal crosses, although this remains to be investigated in more detail. In  
281 order to further confirm the function of MPK6 downstream of GSO1/GSO2 signalling we  
282 attempted to express a constitutively active form of MPK6 under the *RPS5A* promoter in wild  
283 type and double mutant plants, but were unable to generate any transformants, potentially due  
284 to the critical roles played by MPK6 during early embryogenesis.

## 285 **DISCUSSION**

286 It this study, consistent with the similarity between GSO1/2 and PEPR1/2 proteins, we found  
287 that stress-associated kinase MPK6, which has been shown to act downstream of PEPR  
288 signalling [56], shows constitutive phosphorylation in developing seeds, and that this  
289 phosphorylation is partially dependent upon GSO1 and GSO2. In addition, we showed that  
290 GSO1/GSO2, are required for the expression of a set of stress-related genes during early seed  
291 development. Our results suggest that GSO1/GSO2 dependent stress response-related

292 signalling pathways are active in developing seeds. Because of the conserved transcriptional  
293 targets expressed downstream of GSO1/GSO2 dependent signalling, and in defence  
294 responses, this scenario is distinct from previously reported situations in which single  
295 pathway components, such as the co-receptor BAK1, play distinct roles in developmental and  
296 defence-related signalling cascades through interaction with multiple receptors [57,58].  
297 However, the role of the transcriptional targets of GSO1/GSO2 signalling in seeds remains to  
298 be elucidated.

299 Our work also shows that GSO1/GSO2, ALE1 and MPK6 act in a genetic pathway  
300 involved in ensuring embryonic cuticle integrity. We show for the first time that embryonic  
301 cuticle biogenesis involves the coalescence of discontinuous patches of cutin-like material  
302 that appear on the embryo surface at the globular stage, and that pathway mutants are either  
303 incapable of completing, or retarded in the completion of “gap closure” during this process.  
304 Interestingly, GSO1 (also known as SCHENGEN3 [6]) was recently shown to be involved in  
305 ensuring the continuity of another apoplastic diffusion barrier, the Casparian strip, which  
306 prevents the apoplastic movement of solutes from the cortex to the stele of the root [6]. GSO1  
307 may therefore form part of a general mechanism employed by plants for monitoring the  
308 “integrity” of apoplastic barriers formed during plant development.

309 The role of GSO1 and GSO2 in the closure of gaps in the nascent cuticle implies  
310 spatial regulation of signalling outputs at the subcellular level. Cytoplasmic signalling  
311 components which, like MPK6 might not be uncovered by transcriptome analysis but rather  
312 are modified post-translationally, are therefore likely to be of critical importance in GSO1  
313 GSO2 signalling in the embryonic epidermis. Indeed, although MPK6-mediated signalling  
314 has most often been implicated in the control of transcription, particularly via the modulation  
315 of the activity of WRKY transcription factors, evidence for potential roles in cytoplasmic

316 responses, for example during funicular guidance of pollen tubes [46] and control of cell  
317 division planes [50], exist in the literature.

318         Cytoplasmic responses downstream of receptor-like kinases include the local  
319 production of apoplastic Reactive Oxygen Species (ROS) and/or calcium influxes, and indeed  
320 localized ROS production has been implicated in Casparian strip formation [6,59-61].  
321 However although a plausible model has proposed that ROS release could mediate Casparian  
322 strip polymerisation through polymerisation of monolignols [59], it is less obvious how ROS  
323 could directly affect the biosynthesis of an aliphatic cutin-based barrier, although a possible  
324 role for ROS in linking the cuticle to the cell wall has been evoked [62]. ROS production has  
325 been shown to directly modulate the activation of MAPK signalling, providing a mechanism  
326 permitting the reinforcement of localised signalling events [63,64]. Another, potentially  
327 linked, possibility is that GSO1/GSO2 activity in the embryo could spatially direct the  
328 secretion of either cuticle components or enzymes and cell wall components necessary for  
329 their integration into the cutin polymer, in a system analogous to the rapid and highly  
330 localized deposition of callose observed upon hyphal penetration into epidermal cells  
331 (reviewed in [65,66]). Interestingly MPK6 has also been shown to be involved in  
332 phragmoplast formation during root cell division and therefore could be involved in the  
333 localised production/secretion of apoplastic compounds [50]. However, observing these  
334 processes *in situ*, within the living seeds, would require developments in microscopy which  
335 are not yet available.

336         Our work highlights several questions which merit further discussion. A first  
337 important question is whether the GSO1/GSO2 signalling pathway could play a role in  
338 protecting seeds, or more generally plants, against pathogen attack. Cuticle integrity in adult  
339 plants has been shown to be required for resistance to *Pseudomonas* pathovars [67,68]. The  
340 action of the ALE1 GSO1/GSO2 signalling pathway in ensuring embryonic cuticle integrity is

341 therefore likely to have a significant influence on embryo and seedling susceptibility to  
342 bacterial pathogens. However, we have also shown that GSO1/GSO2, ALE1 and MPK6 are  
343 necessary for the expression of known defence marker genes in seeds. Cuticle permeability  
344 phenotypes have neither been reported in the literature for mutants affected in the defence  
345 markers identified in our transcriptome studies, nor found in our own studies (unpublished  
346 results). This raises the question of whether the ALE1, GSO1/GSO2, MPK6 signalling  
347 pathway, in addition to mediating localised apoplastic modifications, could act at a more  
348 global level either to protect developing seeds from the ingress of bacterial pathogens (thus  
349 affecting vertical pathogen transmission), or to “prime” embryos against pathogen attack upon  
350 germination. Exploring this possibility would necessitate functionally separating  
351 susceptibility caused by cuticle defects from lack of immune priming, and will be technically  
352 very challenging, but could ultimately inform strategies aiming to reduce vertical transmission  
353 of plant pathogens.

354         The second question concerns how signalling via GSO1 and GSO2 is triggered in the  
355 seed in the absence of pathogens. In this study we consolidate data supporting the function of  
356 ALE1 in the same pathway as GSO1 and GSO2. We previously proposed that the function of  
357 ALE1, GSO1 and GSO2 in ensuring the apoplastic separation of the embryo and endosperm  
358 became necessary in angiosperms due to developmental constraints imposed by the  
359 sexualisation of the female gametophyte, which led to the simultaneous development of the  
360 embryo and surrounding nutritive tissues post-fertilization, rather than their sequential  
361 development [11,12]. *ALE1* expression is endosperm specific and, as previously suggested  
362 [69], the recruitment of *ALE1* to a function in reinforcing the embryonic cuticle may have  
363 occurred during the emergence of the angiosperm lineage. Subtilases have been shown to be  
364 involved in defence responses and immune priming in plants [70,71]. It is thus possible that  
365 *ALE1* acts to produce an as yet unidentified ligand for the GSO1 and GSO2 receptors. In such

366 a scenario the function of ALE1 in the seed could be analogous to the “immune priming”  
367 function previously reported for the subtilase SBT3.3 [71].

368         Such a scenario naturally raises a third, and important question, around the identity of  
369 the ligand of GSO1 and GSO2. Two sulfated peptides, CIF1 and CIF2, which can act as  
370 ligands for GSO1 during Casparian strip formation, have recently been identified [72,73].  
371 Testing the role of these molecules in developing seeds will be an obvious priority. However  
372 Nakayama and colleagues specifically reported that no cuticle defects (as gauged by  
373 cotyledon fusion phenotypes) were observed in *cif1 cif2* double mutants and the possibility  
374 that other signalling molecules could be involved in ensuring embryonic cuticle integrity  
375 therefore cannot be excluded.

376         In summary, we propose that endosperm-localised factors (like ALE1) may have been  
377 recruited to hijack a defence-signalling pathway involving the ancestor(s) of GSO1 and  
378 GSO2, and downstream signalling components including MPK6, and trigger an “auto-  
379 immune” type response in the embryo to ensure cuticle integrity. The future identification of  
380 further pathway components, and in particular the substrates of ALE1 and ligands of GSO1  
381 and GSO2, will help to confirm this hypothesis.

382

### 383 **Materials and Methods**

384 **Plant material.** The *pGSO1*:GSO1-mVENUS line was kindly donated by Professor Niko  
385 Geldner (Unil-Sorge, University of Lausanne). The *mpk6-2* (SALK\_073907) mutant and the  
386 *mpk3-1* (SALK-151594) were kindly provided by Dr Roberta Galletti.

387 **Growth conditions and plant treatments.** Unless otherwise specified, plants were grown for  
388 10 d in sterile conditions on Murashige and Skoog (MS) agar plates with 0.5% sucrose, 1  
389 month under short-day conditions (19°C, 8h light / 17°C, 16h dark) and then transferred to



390 standard long-day conditions (21°C, 16h light/8h dark) for one more month. To stage  
391 material, newly opened flowers were marked each day for two weeks. For bacterial growth  
392 assays, plants were grown under controlled conditions in a growth chamber at 21°C, with a 9-  
393 hours light period and a light intensity of 190  $\mu\text{mol}\cdot\text{m}^{-2}\cdot\text{s}^{-1}$ . For MPK6 activation analysis,  
394 seedlings were grown for 10 d in MS liquid medium supplemented with 0.5% sucrose in  
395 100 $\mu\text{m}$  cell strainers submerged in 6-well plates (5ml of medium per well). Cell strainers  
396 were transferred to new plates containing MS sucrose 0.5% supplemented with 100 nM or 1  
397 nM flg22 or water and incubated for 15 and 60 minutes at room temperature without skaking.  
398 Seedlings were then rapidly harvested in liquid nitrogen and stored at -80 °C until protein  
399 extraction. For cutin analysis of seedlings, seeds were sterilized, plated on MS medium  
400 supplemented with 0.7 % agar, 0.7 % sucrose and 2.5 mM MES-KOH, pH 5.7, and stratified  
401 in the dark for 3 days at 4°C. Plates were then transferred to a controlled environment growth  
402 chamber at 22°C and with continuous light, and seedlings were grown for 5 days before  
403 harvesting the cotyledons. For toluidine blue staining and Nile-Red staining, sterilized seeds  
404 were spread uniformly on 15 cm MS plates with 0.5% sucrose and 0.4% Phytigel (Sigma)  
405 (pH 5.8) and stratified for 2 days in the dark at 4°C. After stratification seeds were transferred  
406 to a growth chamber and incubated for 6h under continuous light followed by 4 days in the  
407 dark.

408 ***In situ* hybridization.** DNA templates for the probes used in *in situ* hybridizations were  
409 amplified using the primers listed in Supplementary Table 2. Digoxigenin-labelled RNA  
410 probes were produced and hybridized to tissue sections following standard procedures. In  
411 brief, siliques were opened, fixed overnight in ice-cold PBS containing 4% paraformaldehyde,  
412 dehydrated through an ethanol series, embedded in Paraplast Plus (Mc Cormick Scientific)  
413 and sectioned (8  $\mu\text{m}$ ). Immobilized sections were dewaxed and hydrated, treated with 2x  
414 saline sodium citrate (20 min), digested for 15 min at 37°C with proteinase K (20 mg/ml) in

415 50mM Tris-HCl, pH 7.5, 5mM EDTA), treated for 2 min with 0.2% glycine in PBS, rinsed,  
416 postfixed with 4% paraformaldehyde in PBS (10 min, 4°C), rinsed, treated with 0.25% w/v  
417 acetic anhydride in 100mM triethanolamine (pH 8.0 with HCl) for 10 min, rinsed and  
418 dehydrated. Sections were then hybridized under coverslips overnight at 50°C with RNA  
419 probes (produced using DIG RNA labelling kit (Roche)) diluted in DIG easy Hyb solution  
420 (Roche) following the manufacturer's instructions. Following hybridization, the slides were  
421 extensively washed in 0.1x saline sodium citrate and 0.5% SDS at 50 °C (3 h), blocked for 1  
422 hour in 1% blocking solution (Roche) in TBS and for 30 minutes in BSA solution (1% BSA,  
423 0.3% Triton-X-100, 100mM Tris-HCl, 100mM NaCl, 50mM MgCl<sub>2</sub>), and then incubated in a  
424 1/3000 dilution of in alkaline phosphatase-conjugated antidigoxigenin antibody (Roche) in  
425 BSA solution for 2 h at RT. Sections were extensively washed in BSA solution, rinsed and  
426 treated overnight in the dark with a buffered NBT/BCIP solution. Samples were rinsed in  
427 water before air drying and mounting in Entellan (Sigma).

428

429 **Microscopy.** Embryos were imaged by gently bursting seeds between slide and cover-slip in  
430 water and imaging using a dipping lens with a long working distance. Confocal imaging was  
431 carried out on a Zeiss LSM700 with a W N-Acrophlan 40x/0.75 M27 objective. mVENUS was  
432 excited using a 488nm diode laser and fluorescence was collected using a 490-555 nm PMT.  
433 Light microscopy imaging was carried out using a Zeiss axioimager 2. Images were acquired  
434 using bright field illumination.

#### 435 **Histochemical staining with Nile-Red.**

436 5-day-old etiolated seedlings were stained with Nile-Red (Sigma-Aldrich, stock solution at  
437 1mg/mL in DMSO) at 2µg/mL in 50mM PIPES (Sigma-Aldrich) pH 7.0. After 20min of  
438 incubation in dark, seedlings were washing 3-times in water and placed between slide and  
439 lamella. Confocal imaging was performed using a Zeiss LSM700 with 488nm excitation and

440 >530nm emission filters. Images were then processed in the Zeiss LSM Image Browser  
441 Program.

442 **Cutin analysis.** Cuticle composition and content was analyzed as previously described  
443 [74,75].

444 **TEM analysis.** For transmission electron microscopy analysis, seeds were removed from  
445 siliques by removal of the replum tissue with attached seeds. Seeds were high-pressure  
446 frozen with a Leica EM-PACT-1 system. Three seeds were inserted into a flat copper carrier,  
447 fast-frozen, and cryosubstituted into the Leica AFS1 device. The different freeze-substitution  
448 steps were as follows: 54 h at  $-90^{\circ}\text{C}$  in acetone solution containing 0.2% glutaraldehyde, 1%  
449 osmium tetroxide, and 0.1% uranyl acetate. The temperature was then raised with a step of  
450  $2^{\circ}\text{C}/\text{h}$  before remaining for 8 hours at  $-60^{\circ}\text{C}$ . The temperature was raised again to  $-30^{\circ}\text{C}$  for  
451 8h00 before being increased to  $4^{\circ}\text{C}$ . Samples were washed three times for 10 min in 100%  
452 acetone before embedding in Spurr's resin, which was performed progressively (8 h in 25%  
453 Spurr's resin in acetone, 24 h in 50% Spurr's resin in acetone, 24 h in 75% Spurr's resin in  
454 acetone, and two times for 12 h in 100% Spurr's resin). Polymerization was performed at  
455  $70^{\circ}\text{C}$  for 18 h.

456 Samples were sectioned (65 nm sections) and imaged at 120 kV using an FEI TEM tecnai  
457 Spirit with 4 k x 4 k eagle ccd.

458  
459 **Generation of micro-array data.** Microarray analysis was carried out at a Transcriptomic  
460 Platform, POPS, at the Institute of Plant Sciences Paris-Saclay (IPS2, Orsay, France), using a  
461 CATMAv7 array based on AGILENT technology [76]. The CATMAv7 array for the  
462 *Arabidopsis thaliana* genome was made using gene annotations included in FLAGdb++, an  
463 integrative database of plant genomes (<http://urgv.evry.inra.fr/FLAGdb>, [77]). The single high  
464 density CATMAv7 microarray slide contains four chambers, each containing 149 916

465 primers. Each 60 bp primer is present in triplicate in each chamber for robust analysis, and as  
466 both strands. The array contains 35 754 probes (in triplicate) corresponding to genes  
467 annotated in TAIRv8 (among which 476 probes correspond to mitochondrial and chloroplast  
468 genes), 1289 probes corresponding to EUGENE software predictions, 658 probes to  
469 miRNA/MIRs and 240 control probes.

470 3 independent biological replicates were produced. For each biological repetition and  
471 each point, RNA samples were obtained by pooling RNAs from staged siliques containing  
472 embryos at the pre-globular to globular, or the young to late heart stage. Total RNA was  
473 extracted using the Spectrum<sup>TM</sup> Plant Total RNA Kit (Sigma-Aldrich) according to the  
474 suppliers' instructions. For each comparison, one technical replicate with fluorochrome  
475 reversal was performed for each biological replicate (i.e. four hybridizations per comparison).  
476 The labelling of cRNAs with Cy3-dUTP or Cy5-dUTP was performed as described in the  
477 Two-Color Microarray-Based Gene Expression Analysis Low Input Quick Amp Labeling  
478 manual (© Agilent Technologies, Inc.). The hybridization and washing steps were performed  
479 according to the Agilent Microarray Hybridization Chamber User Guide instructions ((©  
480 Agilent Technologies, Inc.). Two micron scanning was performed with InnoScan900 scanner  
481 (Innopsys<sup>R</sup>, Carbonne, FRANCE) and raw data were extracted using Mapix<sup>R</sup> software  
482 (Innopsys<sup>R</sup>, Carbonne, FRANCE).

483  
484 **Statistical Analysis of Microarray Data.** Experiments were designed with the statistics  
485 group of the Unité de Recherche en Génomique Végétale. For each array, the raw data  
486 comprised the logarithm of median feature pixel intensity at wavelengths 635 nm (red) and  
487 532 nm (green). For each array, a global intensity-dependent normalization using the loess  
488 procedure [78] was performed to correct the dye bias. The differential analysis was based on  
489 log-ratio averaging over the duplicate probes and over the technical replicates. Hence the

490 number of available data points for each gene equals the number of biological replicates and  
491 is used to calculate the moderated t-test [79]. Analysis was carried out using the R software  
492 (<http://www.R-project.org>). Under the null hypothesis, no evidence that the specific variances  
493 vary between probes was highlighted by Limma and consequently the moderated t-statistic  
494 was assumed to follow a standard normal distribution. To control the false discovery rate,  
495 adjusted p-values found using the optimized FDR approach [80] were calculated. We  
496 considered as being differentially expressed, the probes with an adjusted p-value  $\leq 0.05$ . The  
497 function SqueezeVar of the library Limma was used to smooth the specific variances by  
498 computing empirical Bayes posterior means. The library kerfdr was used to calculate the  
499 adjusted p-values.

500

501 **Data Deposition.** Microarray data from this article were deposited at Gene Expression  
502 Omnibus (<http://www.ncbi.nlm.nih.gov/geo/>), accession no. GSE68048) and at CATdb  
503 (<http://urgv.evry.inra.fr/CATdb/>; Project: AU14-04\_INASEED) according to the “Minimum  
504 Information About a Microarray Experiment” standards.

505

506 **Quantitative gene expression analysis in seeds.** Intact siliques were frozen in liquid  
507 nitrogen and total RNA was extracted using the Spectrum Plant Total RNA Kit (Sigma). Total  
508 RNAs were digested with Turbo DNA-free DNase I (Ambion) according to the  
509 manufacturer’s instructions. RNA was reverse transcribed using the SuperScript VILO cDNA  
510 Synthesis Kit (Invitrogen) according to the manufacturer’s protocol. PCR reactions were  
511 performed in an optical 384-well plate in the QuantStudio 6 Flex System (Applied  
512 Biosystems), using FastStart Universal SYBR Green Master (Rox) (Roche), in a final volume  
513 of 10  $\mu$ l, according to the manufacturer’s instructions. The following standard thermal profile  
514 was used for all PCR reactions: 95 °C for 10 min, 40 cycles of 95 °C for 10 s, and 60 °C for

515 30 s. Data were analysed using the QuantStudio 6 Flex Real-Time PCR System Software  
516 (Applied Biosystems). As a reference, primers for the EIF4A cDNA were used. PCR  
517 efficiency (E) was estimated from the data obtained from standard curve amplification using  
518 the equation  $E=10^{-1/\text{slope}}$ . Expression levels are presented as  $E^{-\Delta Ct}$ , where  $\Delta Ct=Ct_{GOI}-Ct_{EIF4A}$ .  
519 Primers are listed in Supplementary Table 2.

520 **Toluidine blue staining.** The lids of plates containing etiolated seedlings were removed and  
521 plates were immediately flooded with staining solution [0.05% (w/v) Toluidine Blue + 0.4%  
522 (v/v) Tween-20] for 2 minutes. The staining solution was poured off and plates were  
523 immediately rinsed gently by flooding under a running tap until the water stream was no  
524 longer visibly blue (1-2 minutes). Seedlings were photographed under a Leica MZ12  
525 stereomicroscope.

526 **Protein extraction and MPK6 activation analysis.** Seedlings or seeds were quickly frozen  
527 in liquid nitrogen and proteins were extracted in buffer containing 50 mM Tris pH 7.5, 200  
528 mM NaCl, 1 mM EDTA pH 8, 10% glycerol, 0.1% tween 20, 1 mM phenylmethylsulfonyl  
529 fluoride, 1 mM dithiothreitol, 1x protease inhibitor cocktail P9599 (Sigma-Aldrich), and 1x  
530 MS-Safe protease and phosphatase inhibitor cocktail (Sigma-Aldrich). Equal amounts of  
531 proteins (20 µg for seedlings and 10 µg for seeds) were resolved on 10% polyacrylamide gels  
532 and transferred onto a nylon membrane (Schleicher & Schuell). For seedlings primary  
533 antibodies against phospho p44/42 MAP kinase (1:2000 dilution) (Cell Signaling  
534 Technologies) and then against MPK6 (1:10000 dilution) (Sigma-Aldrich) were used with  
535 horseradish peroxidase-conjugated anti-rabbit as secondary antibody. Signal detection was  
536 performed using the SuperSignal™ West Femto Maximum Sensitivity Substrate kit (Pierce).  
537 For seeds primary antibodies against phospho p44/42 MAP kinase and then against MPK6  
538 were used with IRDye® 800CW Donkey anti-Rabbit IgG (H + LI-COR, 1:10000 dilution),  
539 and the bound complex was detected using the Odyssey Infrared Imaging System (Li-Cor;

540 Lincoln, NE). The images were analysed and quantified with ImageJ. Background was  
541 subtracted for each band. To test the linearity of the detection, 5-15 µg protein from heart  
542 stage developing seeds were treated as previously. To detect the antibody against phospho  
543 p44/42 MAP kinase an anti-Rabbit IgG, HRP conjugate (Amersham, 1:30000) was used.  
544 Anti-alpha-tubulin (Sigma, 1:2000) was used with an anti-mouse IgG, HRP conjugate (GE  
545 HealthCare, 1:10000). Signal detection was performed using Clarity Max™ Western ECL  
546 Substrate (Biorad) with a ChemiDoc Touch (Biorad) instrument. The images were quantified  
547 with ImageJ. Background was subtracted for each band.

548

#### 549 **Acknowledgements**

550 We would like to thank Professor N. Geldner for providing seeds, and A. Lacroix, J. Berger,  
551 P, Bolland, H. Leyral and I. Desbouchages for assistance with plant growth and logistics. AC  
552 was funded by a grant from the French National Research Agency (ANR-13-BSV2-0002,  
553 INASEED). SM was supported by a doctoral grant from the Rhône-Alpes region. RG was  
554 supported by a European Research Council Starting Grant (Phymorph #307387). NMD is  
555 funded by a PhD fellowship from the Ministère de l'Enseignement Supérieur et de la  
556 Recherche. Microscopy and lipid analyses were respectively performed at the Bordeaux  
557 Imaging Center (which is a member of the national infrastructure France BioImaging), and  
558 the Metabolome Facility of the Functional Genomic Center of Bordeaux (which is supported  
559 by the grant MetaboHUB-ANR-11-INBS-0010).

#### 560 **Author contributions**

561 Experiments were carried out by AC, LB, JJ, LT, NMD, SP, SM, ACM and FD. Results were  
562 analyzed by all authors. GI, FD, JJ, TW and RG designed experiments and supervised the  
563 work. GI wrote the paper with contributions from all authors.

564 **The authors declare that they have no competing financial interests.**

565 **Figure Legends**

566 **Figure 1**

567 **Genes involved in cuticle biosynthesis are co-expressed with *GSO1* and *GSO2* during**  
568 **embryogenesis, but their expression is not dependent upon *GSO1* and *GSO2*.** Analysis of  
569 the expression of genes involved in cuticle biosynthesis in wild-type (Col-0) and *gso1-1 gso2-*  
570 *1* seeds containing late globular/triangle, heart and early torpedo stage embryos (left to right).

571 **Figure 2**

572 **Localisation and functionality of the *pGSO1:GSO1-mVENUS* transgene in developing**  
573 **embryos.** Confocal images of GSO1-mVENUS at early heart, mid heart, late heart and early  
574 torpedo stages of development (a-d). (e) The *pGSO1:GSO1-mVENUS* transgene complements  
575 seedling cuticle defects in *gso1-1 gso2-1* double mutants. Quantification of seedling toluidine  
576 blue permeability was carried out as described in Moussu et al., 2017. Error bars represent  
577 standard errors from three biological replicates. (f-h) The *pGSO1-GSO1:mVENUS* transgene  
578 complements seed shape defects in *gso1-1 gso2-1* double mutants. Seed populations from  
579 wild-type (f), *gso1-1 gso2-1* double mutants (g) and *gso1-1 gso2-1* double mutants carrying  
580 the *pGSO1:GSO1-mVENUS* transgene (h). Occasional misshapen shaped seeds are observed  
581 in the complemented line (white arrows), compared with nearly 100% misshapen seeds in the  
582 un-complemented double mutant. Scale bar = 1mm.

583 **Figure 3**

584 **Cuticle permeability defects in *ale1-4* and *gso1-1 gso2-1* seedlings do not correlate with**  
585 **changes in cutin load.** (a) Cotyledons grown *in vitro* for 5 days under continuous light were  
586 collected, delipidated and their cutin content and composition was analyzed as described in



587 the Material and Method section.  $\omega$ OH and DCA stand respectively for omega-hydroxy acid  
588 and  $\alpha,\omega$ -dicarboxylic acid. Mean values are shown in  $\mu\text{g}/\text{mg}$  of delipidated dry residue (DR)  
589  $\pm$  SD of three replicates. Statistical differences were determined according to a Student's *t* test  
590 : \*\*\* denotes  $p < 0.0001$ , \*\* denotes  $p < 0.001$  and \* denotes  $p < 0.01$ . (b) Cuticle permeability to  
591 toluidine blue in etiolated seedlings from the genotypes tested in (a).

## 592 **Figure 4**

593 **Embryonic cuticle biogenesis involves a process of patch coalescence that is defective in**  
594 ***ale1-4* and *gso1-1 gso2-1* mutants.** Analysis of embryonic cuticle deposition in wild-type (a-  
595 d), *gso1-1 gso2-1* (e-f) and *ale1-4* (g,h) embryos at 2 cell (a), mid globular (b), mid heart  
596 (c,e,g) and walking stick (d,f,h) stages of embryogenesis. White arrows show the external face  
597 of the embryonic cuticle. Scale bar = 500nm.

## 598 **Figure 5**

599 **ALE1, GSO1 and GSO2 positively regulate the expression of stress-related genes in**  
600 **seeds.** (a) Summary of overlaps between gene sets showing reduced expression in *ale1-4* and  
601 *gso1-1 gso2-1* mutants at the globular and heart stages of development. (b) GO term analysis  
602 of genes down-regulated in both *ale1-4* and *gso1-1 gso2-2* mutants at the heart stage.

## 603 **Figure 6**

604 **MPK6 acts downstream of ALE1, GSO1 and GSO2 mediated signalling.** (a) Seedling  
605 cuticle permeability phenotypes of *mpk6-2* and *ale1-4* and *gso1-1 gso2-1* mutants and in  
606 double and triple mutant combinations. Scale bar = 2mm (b) Analysis of proteins extracted  
607 from developing seeds at the globular-early torpedo stage. The mutants *mpk3-1* and *mpk6-2*  
608 were included to confirm band identification. No phosphorylation of MPKs other than MPK6  
609 is observed in Col-0, *gso1-1 gso2-1* or *mpk3-1* seeds, but an additional band (\*\*) is

610 systematically observed in the *mpk6-2* mutant background. \* Indicates a non specific band  
611 detected by the anti-MPK6 antibody. This experiment was repeated 7 times on independent  
612 biological samples, with similar results. (c) Degree of phosphorylation of MPK6 in Col-0 and  
613 *gso1-1 gso2-1* mutant seeds. Error bars represent SD of 3 biological replicates (see  
614 Supplementary Figure 16 for linearity testing).

## 615 **Figure 7**

616 **MPK6 activity is required in the embryo and testa, but not the endosperm, for normal**  
617 **seedling development.** (a) Representative phenotypes of toluidine blue-stained seedlings  
618 from wild-type (Col-0), *mpk6-2*, and these backgrounds transformed with *pRGP3-MPK6* or  
619 *pRPS5A-MPK6*. Lines correspond to those described in Supplementary Figure 17. Scale bar =  
620 2mm

## 621 **References**

- 622 1. Ingram GC (2010) Family life at close quarters: communication and constraint in angiosperm seed  
623 development. *Protoplasma* 247: 195-214.
- 624 2. Baroux C, Spillane C, Grossniklaus U (2002) Evolutionary origins of the endosperm in flowering  
625 plants. *Genome Biol* 3: reviews1026.
- 626 3. Fiume E, Fletcher JC (2012) Regulation of Arabidopsis embryo and endosperm development by the  
627 polypeptide signaling molecule CLE8. *Plant Cell* 24: 1000-1012.
- 628 4. Costa LM, Marshall E, Tesfaye M, Silverstein KA, Mori M, et al. (2014) Central cell-derived peptides  
629 regulate early embryo patterning in flowering plants. *Science* 344: 168-172.
- 630 5. Bayer M, Nawy T, Giglione C, Galli M, Meinel T, et al. (2009) Paternal control of embryonic  
631 patterning in Arabidopsis thaliana. *Science* 323: 1485-1488.
- 632 6. Pfister A, Barberon M, Alassimone J, Kalmbach L, Lee Y, et al. (2014) A receptor-like kinase mutant  
633 with absent endodermal diffusion barrier displays selective nutrient homeostasis defects.  
634 *Elife* 3: e03115.
- 635 7. Xing Q, Creff A, Waters A, Tanaka H, Goodrich J, et al. (2013) ZHOUP1 controls embryonic cuticle  
636 formation via a signalling pathway involving the subtilisin protease ABNORMAL LEAF-SHAPE1  
637 and the receptor kinases GASSHO1 and GASSHO2. *Development* 140: 770-779.
- 638 8. Yang S, Johnston N, Talideh E, Mitchell S, Jeffree C, et al. (2008) The endosperm-specific ZHOUP1  
639 gene of Arabidopsis thaliana regulates endosperm breakdown and embryonic epidermal  
640 development. *Development* 135: 3501-3509.
- 641 9. Tsuwamoto R, Fukuoka H, Takahata Y (2008) GASSHO1 and GASSHO2 encoding a putative leucine-  
642 rich repeat transmembrane-type receptor kinase are essential for the normal development  
643 of the epidermal surface in Arabidopsis embryos. *Plant J* 54: 30-42.

- 644 10. Tanaka H, Onouchi H, Kondo M, Hara-Nishimura I, Nishimura M, et al. (2001) A subtilisin-like  
645 serine protease is required for epidermal surface formation in Arabidopsis embryos and  
646 juvenile plants. *Development* 128: 4681-4689.
- 647 11. Moussu S, San-Bento R, Galletti R, Creff A, Farcot E, et al. (2013) Embryonic cuticle establishment:  
648 the great (apoplastic) divide. *Plant Signal Behav* 8: e27491.
- 649 12. San-Bento R, Farcot E, Galletti R, Creff A, Ingram G (2014) Epidermal identity is maintained by  
650 cell-cell communication via a universally active feedback loop in Arabidopsis thaliana. *Plant J*  
651 77: 46-58.
- 652 13. Bernard A, Joubes J (2012) Arabidopsis cuticular waxes: Advances in synthesis, export and  
653 regulation. *Prog Lipid Res* 52: 110-129.
- 654 14. Fich EA, Segerson NA, Rose JK (2016) The Plant Polyester Cutin: Biosynthesis, Structure, and  
655 Biological Roles. *Annu Rev Plant Biol* 10.1146/annurev-arplant-043015-111929.
- 656 15. Javelle M, Vernoud V, Rogowsky PM, Ingram GC (2011) Epidermis: the formation and functions of  
657 a fundamental plant tissue. *New Phytol* 189: 17-39.
- 658 16. Serrano M, Coluccia F, Torres M, L'Haridon F, Metraux JP (2014) The cuticle and plant defense to  
659 pathogens. *Front Plant Sci* 5: 274.
- 660 17. Tanaka T, Tanaka H, Machida C, Watanabe M, Machida Y (2004) A new method for rapid  
661 visualization of defects in leaf cuticle reveals five intrinsic patterns of surface defects in  
662 Arabidopsis. *Plant J* 37: 139-146.
- 663 18. Delude C, Moussu S, Joubes J, Ingram G, Domergue F (2016) Plant Surface Lipids and Epidermis  
664 Development. *Sub-cellular biochemistry* 86: 287-313.
- 665 19. Le BH, Cheng C, Bui AQ, Wagmaister JA, Henry KF, et al. (2010) Global analysis of gene activity  
666 during Arabidopsis seed development and identification of seed-specific transcription  
667 factors. *Proc Natl Acad Sci U S A* 107: 8063-8070.
- 668 20. Winter D, Vinegar B, Nahal H, Ammar R, Wilson GV, et al. (2007) An "Electronic Fluorescent  
669 Pictograph" browser for exploring and analyzing large-scale biological data sets. *PLoS One* 2:  
670 e718.
- 671 21. Belmonte MF, Kirkbride RC, Stone SL, Pelletier JM, Bui AQ, et al. (2013) Comprehensive  
672 developmental profiles of gene activity in regions and subregions of the Arabidopsis seed.  
673 *Proc Natl Acad Sci U S A* 110: E435-444.
- 674 22. Lu S, Song T, Kosma DK, Parsons EP, Rowland O, et al. (2009) Arabidopsis CER8 encodes LONG-  
675 CHAIN ACYL-COA SYNTHETASE 1 (LACS1) that has overlapping functions with LACS2 in plant  
676 wax and cutin synthesis. *Plant J* 59: 553-564.
- 677 23. Schnurr J, Shockey J, Browse J (2004) The acyl-CoA synthetase encoded by LACS2 is essential for  
678 normal cuticle development in Arabidopsis. *Plant Cell* 16: 629-642.
- 679 24. Li-Beisson Y, Shorrosh B, Beisson F, Andersson MX, Arondel V, et al. (2013) Acyl-lipid metabolism.  
680 *Arabidopsis Book* 11: e0161.
- 681 25. Beisson F, Li-Beisson Y, Pollard M (2012) Solving the puzzles of cutin and suberin polymer  
682 biosynthesis. *Curr Opin Plant Biol* 15: 329-337.
- 683 26. Pruitt RE, Vielle-Calzada JP, Ploense SE, Grossniklaus U, Lolle SJ (2000) FIDDLEHEAD, a gene  
684 required to suppress epidermal cell interactions in Arabidopsis, encodes a putative lipid  
685 biosynthetic enzyme. *Proc Natl Acad Sci U S A* 97: 1311-1316.
- 686 27. Yephremov A, Wisman E, Huijser P, Huijser C, Wellesen K, et al. (1999) Characterization of the  
687 FIDDLEHEAD gene of Arabidopsis reveals a link between adhesion response and cell  
688 differentiation in the epidermis. *The Plant Cell* 11: 2187-2201.
- 689 28. Wellesen K, Durst F, Pinot F, Benveniste I, Nettesheim K, et al. (2001) Functional analysis of the  
690 LACERATA gene of Arabidopsis provides evidence for different roles of fatty acid omega -  
691 hydroxylation in development. *Proc Natl Acad Sci U S A* 98: 9694-9699.
- 692 29. Kurdyukov S, Faust A, Nawrath C, Bar S, Voisin D, et al. (2006) The epidermis-specific extracellular  
693 BODYGUARD controls cuticle development and morphogenesis in Arabidopsis. *Plant Cell* 18:  
694 321-339.

- 695 30. Debono A, Yeats TH, Rose JK, Bird D, Jetter R, et al. (2009) Arabidopsis LTPG Is a  
696 Glycosylphosphatidylinositol-Anchored Lipid Transfer Protein Required for Export of Lipids to  
697 the Plant Surface. *Plant Cell*.
- 698 31. Bird D, Beisson F, Brigham A, Shin J, Greer S, et al. (2007) Characterization of Arabidopsis  
699 ABCG11/WBC11, an ATP binding cassette (ABC) transporter that is required for cuticular lipid  
700 secretion. *Plant J* 52: 485-498.
- 701 32. Li Y, Beisson F, Koo AJ, Molina I, Pollard M, et al. (2007) Identification of acyltransferases required  
702 for cutin biosynthesis and production of cutin with suberin-like monomers. *Proc Natl Acad Sci*  
703 *U S A* 104: 18339-18344.
- 704 33. Sarnowski TJ, Rios G, Jasik J, Swiezewski S, Kaczanowski S, et al. (2005) SWI3 subunits of putative  
705 SWI/SNF chromatin-remodeling complexes play distinct roles during Arabidopsis  
706 development. *Plant Cell* 17: 2454-2472.
- 707 34. Shiu SH, Bleecker AB (2001) Receptor-like kinases from Arabidopsis form a monophyletic gene  
708 family related to animal receptor kinases. *Proc Natl Acad Sci U S A* 98: 10763-10768.
- 709 35. Shiu SH, Bleecker AB (2003) Expansion of the receptor-like kinase/Pelle gene family and receptor-  
710 like proteins in Arabidopsis. *Plant Physiol* 132: 530-543.
- 711 36. Yamaguchi Y, Huffaker A, Bryan AC, Tax FE, Ryan CA (2010) PEPR2 is a second receptor for the  
712 Pep1 and Pep2 peptides and contributes to defense responses in Arabidopsis. *Plant Cell* 22:  
713 508-522.
- 714 37. Krol E, Mentzel T, Chinchilla D, Boller T, Felix G, et al. (2010) Perception of the Arabidopsis danger  
715 signal peptide 1 involves the pattern recognition receptor AtPEPR1 and its close homologue  
716 AtPEPR2. *J Biol Chem* 285: 13471-13479.
- 717 38. Yamaguchi Y, Huffaker A (2011) Endogenous peptide elicitors in higher plants. *Curr Opin Plant*  
718 *Biol* 14: 351-357.
- 719 39. Lopez-Bucio JS, Dubrovsky JG, Raya-Gonzalez J, Ugartechea-Chirino Y, Lopez-Bucio J, et al. (2014)  
720 Arabidopsis thaliana mitogen-activated protein kinase 6 is involved in seed formation and  
721 modulation of primary and lateral root development. *J Exp Bot* 65: 169-183.
- 722 40. Zhang M, Wu H, Su J, Wang H, Zhu Q, et al. (2017) Maternal control of embryogenesis by MPK6  
723 and its upstream MKK4/MKK5 in Arabidopsis. *Plant J* 92: 1005-1019.
- 724 41. Moussu S, Doll NM, Chamot S, Brocard L, Creff A, et al. (2017) ZHOUP1 and KERBEROS Mediate  
725 Embryo/Endosperm Separation by Promoting the Formation of an Extracuticular Sheath at  
726 the Embryo Surface. *Plant Cell* 29: 1642-1656.
- 727 42. Zhang Y, Wang P, Shao W, Zhu JK, Dong J (2015) The BASL polarity protein controls a MAPK  
728 signaling feedback loop in asymmetric cell division. *Dev Cell* 33: 136-149.
- 729 43. Sethi V, Raghuram B, Sinha AK, Chattopadhyay S (2014) A mitogen-activated protein kinase  
730 cascade module, MKK3-MPK6 and MYC2, is involved in blue light-mediated seedling  
731 development in Arabidopsis. *Plant Cell* 26: 3343-3357.
- 732 44. Smekalova V, Luptovciak I, Komis G, Samajova O, Ovecka M, et al. (2014) Involvement of YODA  
733 and mitogen activated protein kinase 6 in Arabidopsis post-embryonic root development  
734 through auxin up-regulation and cell division plane orientation. *New Phytol* 203: 1175-1193.
- 735 45. Guan Y, Meng X, Khanna R, LaMontagne E, Liu Y, et al. (2014) Phosphorylation of a WRKY  
736 transcription factor by MAPKs is required for pollen development and function in  
737 Arabidopsis. *PLoS Genet* 10: e1004384.
- 738 46. Guan Y, Lu J, Xu J, McClure B, Zhang S (2014) Two Mitogen-Activated Protein Kinases, MPK3 and  
739 MPK6, Are Required for Funicular Guidance of Pollen Tubes in Arabidopsis. *Plant Physiol* 165:  
740 528-533.
- 741 47. Jewaria PK, Hara T, Tanaka H, Kondo T, Betsuyaku S, et al. (2013) Differential effects of the  
742 peptides Stomagen, EPF1 and EPF2 on activation of MAP kinase MPK6 and the SPCH protein  
743 level. *Plant Cell Physiol* 54: 1253-1262.
- 744 48. Khan M, Rozhon W, Bigeard J, Pflieger D, Husar S, et al. (2013) Brassinosteroid-regulated  
745 GSK3/Shaggy-like kinases phosphorylate mitogen-activated protein (MAP) kinase kinases,  
746 which control stomata development in Arabidopsis thaliana. *J Biol Chem* 288: 7519-7527.

- 747 49. Meng X, Wang H, He Y, Liu Y, Walker JC, et al. (2012) A MAPK cascade downstream of ERECTA  
748 receptor-like protein kinase regulates Arabidopsis inflorescence architecture by promoting  
749 localized cell proliferation. *Plant Cell* 24: 4948-4960.
- 750 50. Muller J, Beck M, Mettbach U, Komis G, Hause G, et al. (2010) Arabidopsis MPK6 is involved in cell  
751 division plane control during early root development, and localizes to the pre-prophase  
752 band, phragmoplast, trans-Golgi network and plasma membrane. *Plant J* 61: 234-248.
- 753 51. Cho SK, Larue CT, Chevalier D, Wang H, Jinn TL, et al. (2008) Regulation of floral organ abscission  
754 in Arabidopsis thaliana. *Proc Natl Acad Sci U S A* 105: 15629-15634.
- 755 52. Wang H, Liu Y, Bruffett K, Lee J, Hause G, et al. (2008) Haplo-insufficiency of MPK3 in MPK6  
756 mutant background uncovers a novel function of these two MAPKs in Arabidopsis ovule  
757 development. *Plant Cell* 20: 602-613.
- 758 53. Ren D, Liu Y, Yang KY, Han L, Mao G, et al. (2008) A fungal-responsive MAPK cascade regulates  
759 phytoalexin biosynthesis in Arabidopsis. *Proc Natl Acad Sci U S A* 105: 5638-5643.
- 760 54. Moussu SA, Doll NM, Chamot S, Brocard L, Creff A, et al. (2017) ZHOUP1 and KERBEROS Mediate  
761 Embryo/Endosperm Separation by Promoting the Formation of an Extra-Cuticular Sheath at  
762 the Embryo Surface. *Plant Cell* 10.1105/tpc.17.00016.
- 763 55. Denay G, Creff A, Moussu S, Wagnon P, Thevenin J, et al. (2014) Endosperm breakdown in  
764 Arabidopsis requires heterodimers of the basic helix-loop-helix proteins ZHOUP1 and  
765 INDUCER OF CBP EXPRESSION 1. *Development* 141: 1222-1227.
- 766 56. Bartels S, Lori M, Mbengue M, van Verk M, Klausner D, et al. (2013) The family of Peps and their  
767 precursors in Arabidopsis: differential expression and localization but similar induction of  
768 pattern-triggered immune responses. *J Exp Bot* 64: 5309-5321.
- 769 57. Postel S, Kufner I, Beuter C, Mazzotta S, Schwedt A, et al. (2010) The multifunctional leucine-rich  
770 repeat receptor kinase BAK1 is implicated in Arabidopsis development and immunity. *Eur J*  
771 *Cell Biol* 89: 169-174.
- 772 58. Kim BH, Kim SY, Nam KH (2013) Assessing the diverse functions of BAK1 and its homologs in  
773 arabidopsis, beyond BR signaling and PTI responses. *Molecules and cells* 35: 7-16.
- 774 59. Lee Y, Rubio MC, Alassimone J, Geldner N (2013) A mechanism for localized lignin deposition in  
775 the endodermis. *Cell* 153: 402-412.
- 776 60. Steinhorst L, Kudla J (2013) Calcium and reactive oxygen species rule the waves of signaling. *Plant*  
777 *Physiol* 163: 471-485.
- 778 61. Kadota Y, Shirasu K, Zipfel C (2015) Regulation of the NADPH Oxidase RBOHD During Plant  
779 Immunity. *Plant Cell Physiol* 56: 1472-1480.
- 780 62. Dominguez E, Heredia-Guerrero JA, Heredia A (2015) Plant cutin genesis: unanswered questions.  
781 *Trends Plant Sci* 20: 551-558.
- 782 63. Liu Y, He C (2017) A review of redox signaling and the control of MAP kinase pathway in plants.  
783 *Redox Biol* 11: 192-204.
- 784 64. Jalmi SK, Sinha AK (2015) ROS mediated MAPK signaling in abiotic and biotic stress- striking  
785 similarities and differences. *Front Plant Sci* 6: 769.
- 786 65. Ellinger D, Voigt CA (2014) Callose biosynthesis in Arabidopsis with a focus on pathogen response:  
787 what we have learned within the last decade. *Annals of botany* 114: 1349-1358.
- 788 66. Voigt CA (2014) Callose-mediated resistance to pathogenic intruders in plant defense-related  
789 papillae. *Front Plant Sci* 5: 168.
- 790 67. Tang D, Simonich MT, Innes RW (2007) Mutations in LACS2, a long-chain acyl-coenzyme A  
791 synthetase, enhance susceptibility to avirulent *Pseudomonas syringae* but confer resistance  
792 to *Botrytis cinerea* in Arabidopsis. *Plant Physiology* 144: 1093-1103.
- 793 68. Xiao F, Goodwin SM, Xiao Y, Sun Z, Baker D, et al. (2004) Arabidopsis CYP86A2 represses  
794 *Pseudomonas syringae* type III genes and is required for cuticle development. *EMBO J* 23:  
795 2903-2913.
- 796 69. Waters A, Creff A, Goodrich J, Ingram G (2013) "What we've got here is failure to communicate":  
797 Zou mutants and endosperm cell death in seed development. *Plant Signal Behav* 8.

- 798 70. Pearce G, Yamaguchi Y, Barona G, Ryan CA (2010) A subtilisin-like protein from soybean contains  
799 an embedded, cryptic signal that activates defense-related genes. Proc Natl Acad Sci U S A  
800 107: 14921-14925.
- 801 71. Ramirez V, Lopez A, Mauch-Mani B, Gil MJ, Vera P (2013) An extracellular subtilase switch for  
802 immune priming in Arabidopsis. PLoS Pathog 9: e1003445.
- 803 72. Nakayama T, Shinohara H, Tanaka M, Baba K, Ogawa-Ohnishi M, et al. (2017) A peptide hormone  
804 required for Casparian strip diffusion barrier formation in Arabidopsis roots. Science 355:  
805 284-286.
- 806 73. Doblaz VG, Smakowska-Luzan E, Fujita S, Alassimone J, Barberon M, et al. (2017) Root diffusion  
807 barrier control by a vasculature-derived peptide binding to the SGN3 receptor. Science 355:  
808 280-284.
- 809 74. Domergue F, Vishwanath SJ, Joubes J, Ono J, Lee JA, et al. (2010) Three Arabidopsis fatty acyl-  
810 coenzyme A reductases, FAR1, FAR4, and FAR5, generate primary fatty alcohols associated  
811 with suberin deposition. Plant Physiol 153: 1539-1554.
- 812 75. Bourdenx B, Bernard A, Domergue F, Pascal S, Leger A, et al. (2011) Overexpression of  
813 Arabidopsis ECERIFERUM1 promotes wax very-long-chain alkane biosynthesis and influences  
814 plant response to biotic and abiotic stresses. Plant Physiol 156: 29-45.
- 815 76. Gagnot S, Tamby JP, Martin-Magniette ML, Bitton F, Taconnat L, et al. (2008) CATdb: a public  
816 access to Arabidopsis transcriptome data from the URGV-CATMA platform. Nucleic Acids Res  
817 36: D986-990.
- 818 77. Derozier S, Samson F, Tamby JP, Guichard C, Brunaud V, et al. (2011) Exploration of plant  
819 genomes in the FLAGdb++ environment. Plant Methods 7: 8.
- 820 78. Yang YH, Dudoit S, Luu P, Lin DM, Peng V, et al. (2002) Normalization for cDNA microarray data: a  
821 robust composite method addressing single and multiple slide systematic variation. Nucleic  
822 Acids Res 30: e15.
- 823 79. Smyth GK (2004) Linear models and empirical bayes methods for assessing differential expression  
824 in microarray experiments. Statistical applications in genetics and molecular biology 3:  
825 Article3.
- 826 80. Storey JD, Tibshirani R (2003) Statistical significance for genomewide studies. Proc Natl Acad Sci U  
827 S A 100: 9440-9445.

828

## 829 **Supporting Information Legends**

830 **Supplementary Figure 1 (Related to Figure 1) : Genes involved in cuticle biosynthesis**  
831 **are expressed early during embryo development and are co-expressed with GSO1 and**  
832 **GSO2.** Expression data for *LACS2* (a), *FDH* (b), *BDG* (c), *LCR* (d), *LTPG1* (e), *ABCG11* (f),  
833 *GSO1* (g) and *GSO2* (h) downloaded from the Seed Gene Network resource  
834 (<http://seedgenenetwork.net/>).

835 **Supplementary Figure 2 (Related to Figure 1) : Genes involved in cuticle biosynthesis**  
836 **are co-expressed with GSO1 and GSO2 in the embryonic epidermis during**  
837 **embryogenesis, but their expression is not dependent upon GSO1 and GSO2.** Analysis

838 of the expression of genes involved in cuticle biosynthesis in wild-type (Col-0) and *gso1-1*  
839 *gso2-1* seeds containing late globular/triangle, heart and early torpedo stage embryos (left to  
840 right).

841 **Supplementary Figure 3 (Related to Figure 1) : Hybridization of tissue sections to an**  
842 **antisense *GFP* probe as negative control in Col-0 (a-c) and *gso1 gso2* (d-f) seeds**  
843 **containing late globular (a,d), heart (b,e) and early torpedo (c,f) stage embryos.**  
844 Expression of *LTPG1* in wild type seed containing torpedo stage embryo is shown in (g) for  
845 direct comparison.

846 **Supplementary Figure 4 (Related to Figure 4) : Analysis of the permeability of**  
847 **extruded Col-0 embryos at different developmental stages to toluidine blue treatment.**  
848 Three stained and one unstained embryo (below) are shown for each developmental stage.  
849 Scale bar = 100mm

850 **Supplementary Figure 5 (Related to Figure 4) : Cuticle discontinuities in early wild-**  
851 **type (Col-0) embryos and later *gso1 gso2* embryos. a,b)** Cuticle the mid-late globular  
852 stage (during gap closure) in Col-0 embryos showing discontinuous cuticle. *gso1-1 gso2-1*  
853 mutant embryos maintain a diffuse and discontinuous cuticle at later stages. Analysis of  
854 embryonic cuticle deposition in *gso1-1 gso2-1* at the *mid heart* (c-d) and walking stick (e-f)  
855 stages of embryogenesis, when wild-type cuticle is continuous. White arrows show external  
856 face of embryonic cuticle. Scale bar = 500nm.

857 **Supplementary Figure 6 (Related to Figure 5) : GO term analysis of genes showing**  
858 **increased expression in siliques of both *gso1-1 gso2-1* and *ale1-4* mutant**  
859 **backgrounds at the globular (a) and heart (b) stages of embryo development.** The  
860 degree of overlap between these datasets is illustrated in (c).

861 **Supplementary Figure 7 (Related to Figure 5) : GO term analysis of genes showing**  
862 **reduced expression in siliques of both *gso1-1 gso2-1* and *ale1-4* mutant backgrounds**  
863 **at the globular (a) and heart (b) stages of embryo development.**

864 **Supplementary Figure 8 (Related to Figure 5) : Validation by qRT-PCR of microarray**  
865 **data.** Experiments were carried out in 4 biological replicates. Values are expressed relative  
866 to the *EIF4A* gene. Significance values indicated were calculated using a Student's t-test. \*\*\*  
867 denotes  $p < 0.01$ , \*\* denotes  $p < 0.05$  and \* denotes  $p < 0.1$ . Bars indicate standard errors.

868 **Supplementary Figure 9 (Related to Figure 5) : Analysis of the expression of *SWI3A* in**  
869 **wild-type (a-c), *gso1-1 gso2-1* (d-f) mutant embryos in seeds containing late**  
870 **globular/triangle (a,d), heart (b,e) and early torpedo (c,f) stage embryos.** Expression  
871 data for *SWI3A* downloaded from the Seed Gene Network resource  
872 (<http://seedgenenetwork.net/>) is shown in (g).

873 **Supplementary Figure 10 (Related to Figure 6) : Non additivity of seed twisting (a-b)**  
874 **and seedling cuticle permeability (c) phenotypes between *mpk6-2* and *ale1-4* mutants**  
875 **and between *mpk6-2* and *gso1-1 gso2-1* double mutants.** Populations of seeds (a) from  
876 single double and triple mutants were photographed, and seed phenotypes were quantified  
877 (b)(Col-0 n= 196, *ale1-4* n=200, *mpk6-2* n=210, *gso1-1 gso2-1* n=111, *mpk6-2 ale1-4* (3  
878 individuals) n = 211, 212 and 238, *mpk6-2 gso1-1 gso2-1* n=86). Etiolated seedlings were  
879 treated with toluidine blue and seedling and toluidine blue phenotypes were quantified (c).  
880 Results are representative of three independent experiments. Col-0 n=389, *ale1-4* n=387 ,  
881 *mpk6-2* n=383, *mpk6-2 ale1-4* n=398. (Quantifications were not possible for *mpk6-2 gso1-1*  
882 *gso2-1* triple mutants due to low seed set).

883 **Supplementary Figure 11 (Related to Figure 6) : Cuticle phenotypes using Nile-Red**  
884 **staining of etiolated cotyledons.** Genotypes are indicated on left panels with zones  
885 magnified on the right highlighted by white boxes. Arrows indicate position of the cuticle and  
886 arrowheads indicate gaps in the cuticle. a) Biological replicate 1.

887 **Cuticle phenotypes using Nile-Red staining of etiolated cotyledons.** b) Biological  
888 replicate 2



889 **Supplementary Figure 13 (Related to Figure 6) : qRT-PCR analysis of the expression of**  
890 **candidate target genes in *mpk6-2* mutant siliques.** Experiments were carried out in  
891 biological triplicate. Values are expressed relative to *EIF4* gene expression. Significance  
892 values indicated were calculated using a Student's t-test. \*\*\* denotes  $p < 0.01$ , \*\*denotes  
893  $p < 0.05$  and \* denotes  $p < 0.1$ . Bars indicate standard errors.

894 **Supplementary Figure 14 (Related to Figure 6) : GSO1 and GSO2 are not necessary for**  
895 **MPK6 phosphorylation in response to PAMP-elicitation in seedlings.** Western blot  
896 analysis of phosphorylated MPK proteins (upper panel) and then total MPK6 protein (middle  
897 panel). Loading control (Ponceau S-stained Rubisco) is shown in lower panel. The same  
898 blot is shown in the upper middle and lower panel. \* Indicates a non specific band detected  
899 by the anti-MPK6 antibody. Seedlings were treated with water or with 100nM flg22 for either  
900 15 or 60 minutes before protein extraction. The mutants *mpk3-1* and *mpk6-2* were included  
901 to confirm band identities.

902 **Supplementary Figure 15 (Related to Figure 6) : *gso1 gso2* mutant seedlings are not**  
903 **significantly affected in the MPK6 phosphorylation response to flg22.** Western blot  
904 analysis of phosphorylated MPK proteins (upper panels) and then total MPK6 protein (middle  
905 panels). Loading control (Ponceau S-stained Rubisco) is shown in lower panel. The same  
906 blot is shown in the upper middle and lower panel. \* Indicates a non specific band detected  
907 by the anti-MPK6 antibody. Seedlings were treated with water or with 1nM flg22 for either 15  
908 or 60 minutes before protein extraction.

909 **Supplementary Figure 16 (Related to Figure 6) : Developing *gso1 gso2* mutant seeds**  
910 **show reduced levels of MPK6 phosphorylation compared to wild-type seeds.** a)  
911 Western blot analysis of phosphorylated MPK6 protein in developing seeds exposed at four  
912 consecutive one minute intervals (to confirm signal linearity). Loading control ( $\alpha$ -tubulinA) is  
913 shown in lower panel. B) Degree of phosphorylation of MPK6 in Col-0 and *gso1-1 gso2-1*  
914 mutant seeds. Error bars represent SD of 3 biological replicates.

915 **Supplementary Figure 17 (Related to Figure 7) : MPK6 is required in the embryo and**  
916 **testa, but not the endosperm (a)** Representative phenotypes of seeds from wild-type (Col-  
917 0), *mpk6-2*, and these backgrounds transformed with *pRGP3-MPK6* or *pRPS5A-MPK6*. **(b)**  
918 Quantification of seed phenotypes in the above material. Seeds from at least two  
919 independent transgenic lines have been quantified.

920  
921  
922  
923  
924  
925  
926

927

Figure 1

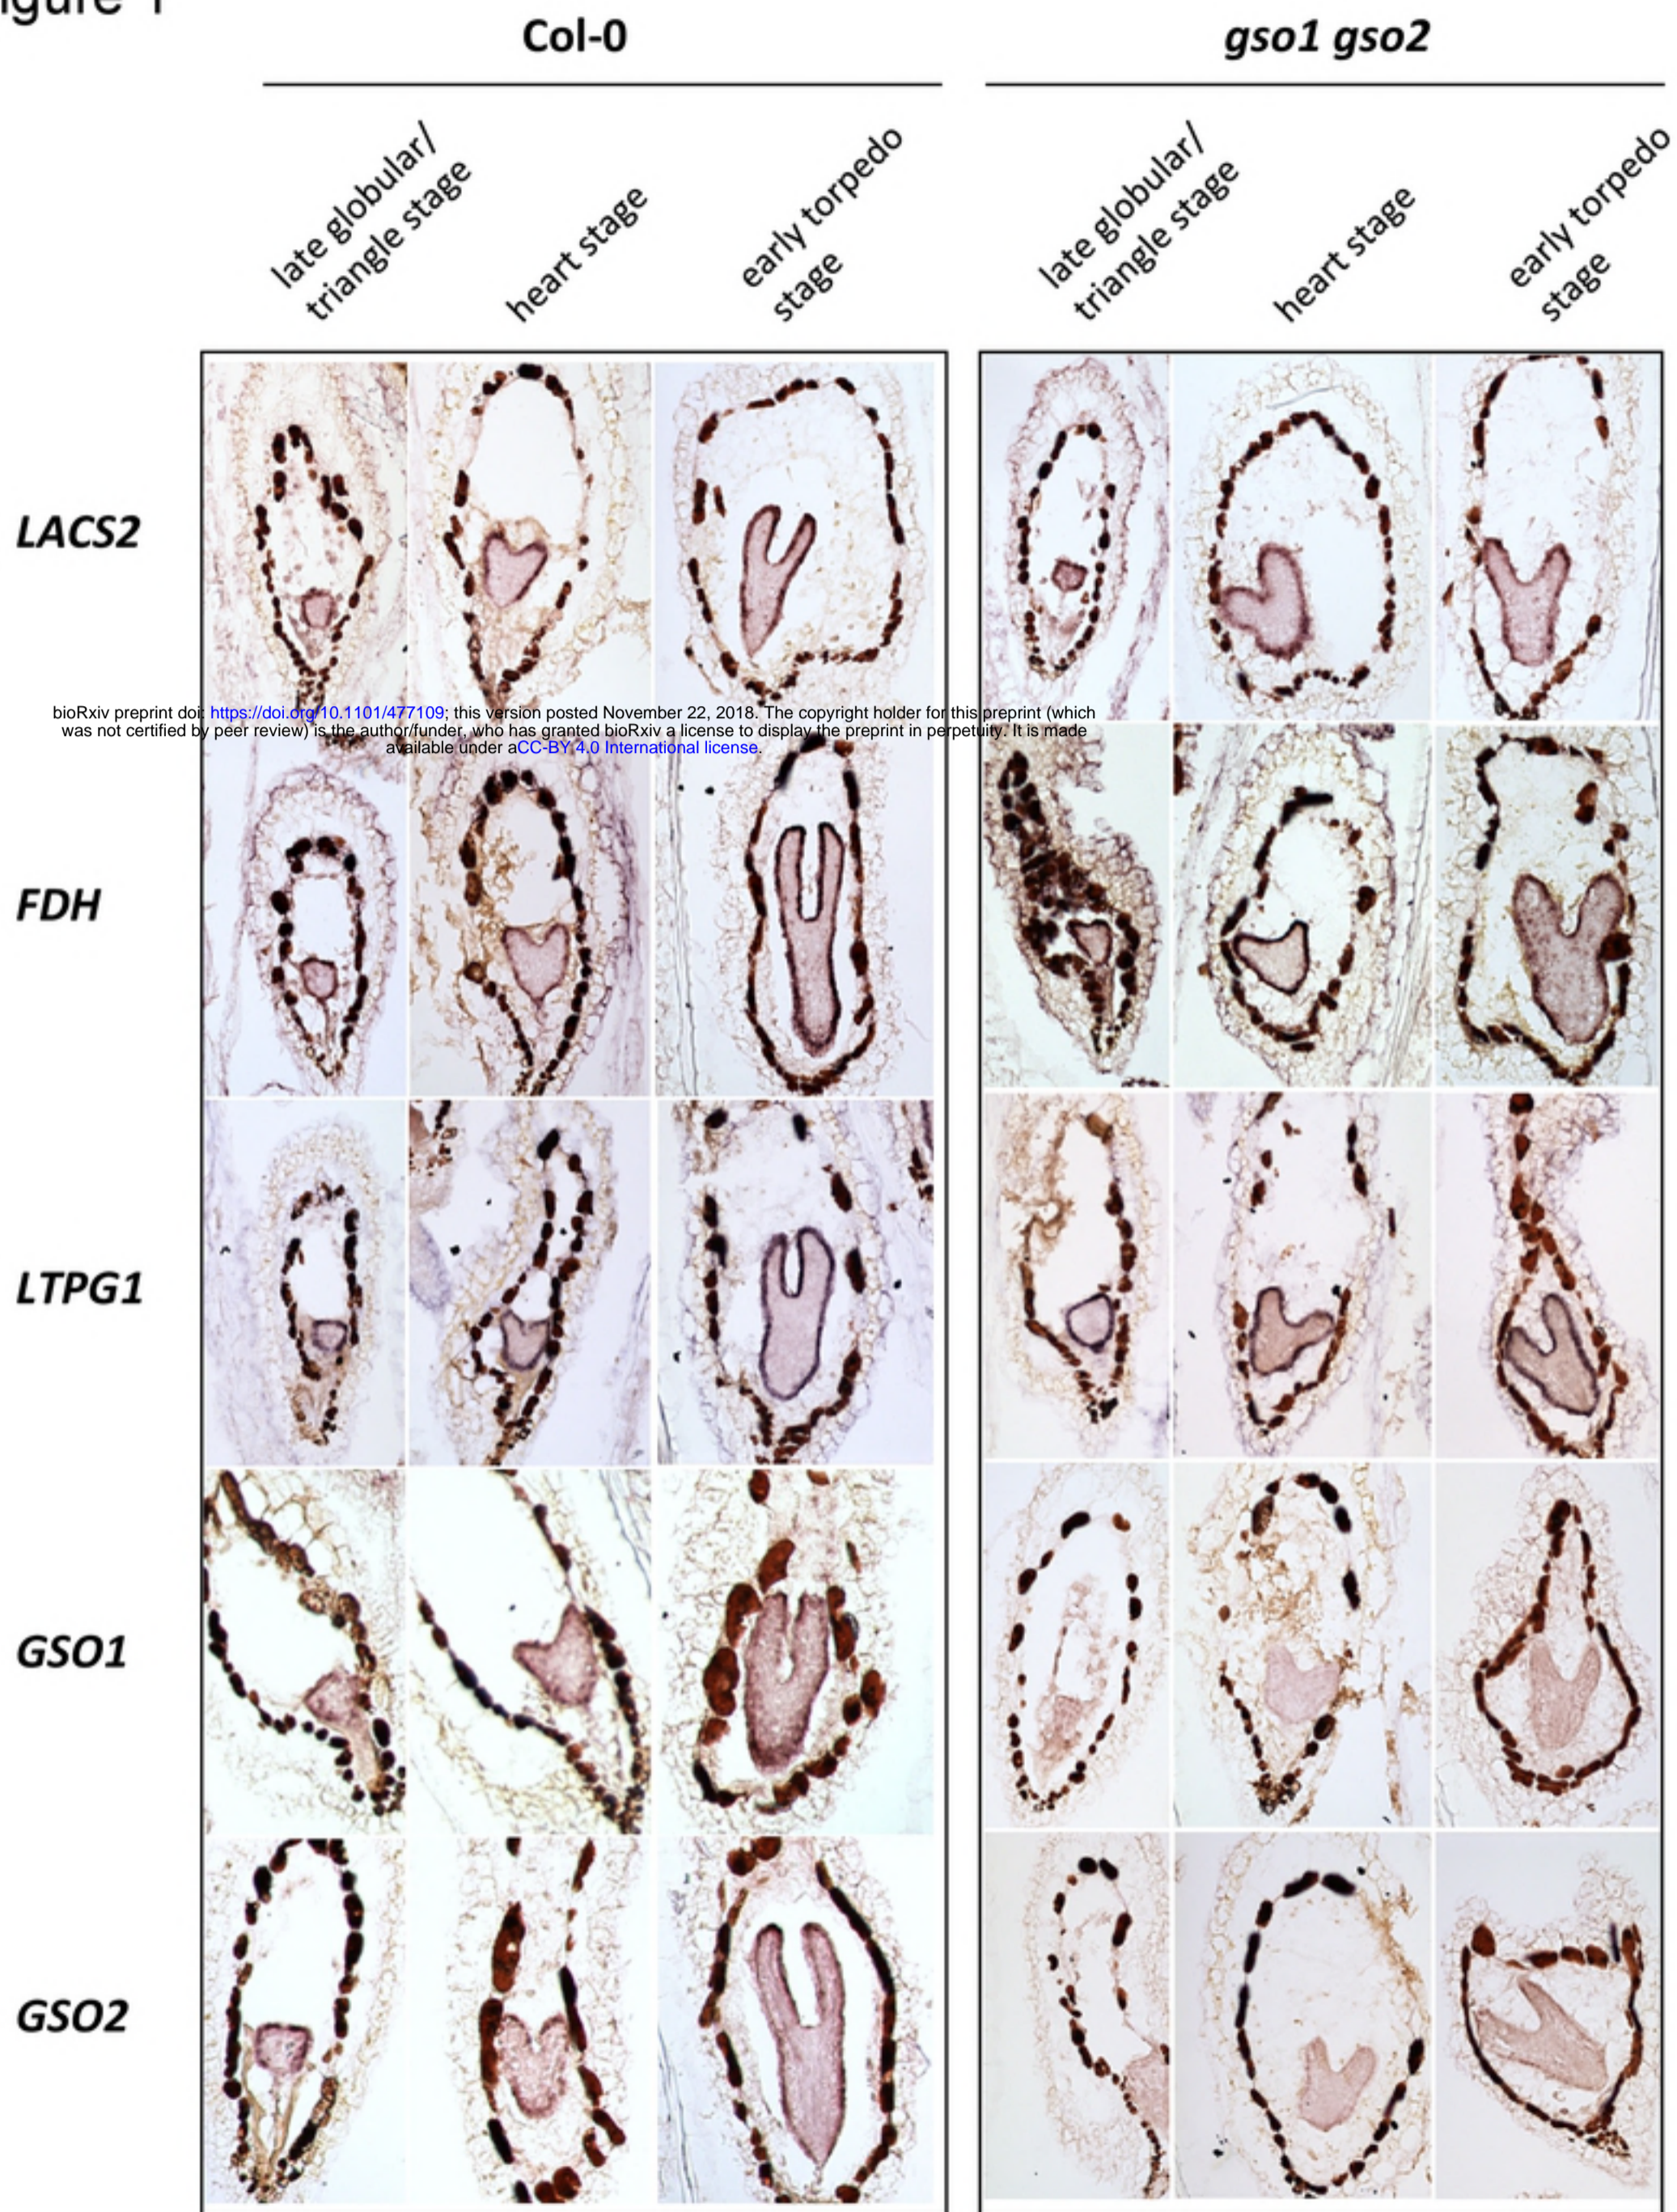

bioRxiv preprint doi: <https://doi.org/10.1101/477109>; this version posted November 22, 2018. The copyright holder for this preprint (which was not certified by peer review) is the author/funder, who has granted bioRxiv a license to display the preprint in perpetuity. It is made available under aCC-BY 4.0 International license.

Figure 1

Genes involved in cuticle biosynthesis are co-expressed with *GSO1* and *GSO2* during embryogenesis, but their expression is not dependent upon *GSO1* and *GSO2*. Analysis of the expression of genes involved in cuticle biosynthesis in wild-type (Col-0) and *gso1-1 gso2-1* seeds containing late globular/triangle, heart and early torpedo stage embryos (left to right).
